# Supplementary material for: LncRNA Sox2OT-V7 promotes doxorubicin-induced autophagy and chemoresistance in osteosarcoma via tumor-suppressive miR-142/miR-22
Source: publisher site journal article supplement (doi:10.18632/aging.103004), 2020-04-16
Supplement: Supplementary file [file aging-v12i8-103004-supplementary-material-SD1.pdf]

## SUPPLEMENTARY FIGURES

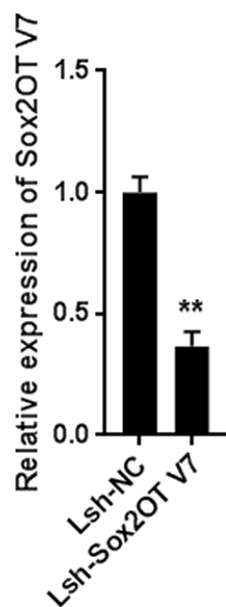

Supplementary Figure 1. The knockdown effect of Sox2OT-V7 was determined by QPCR.

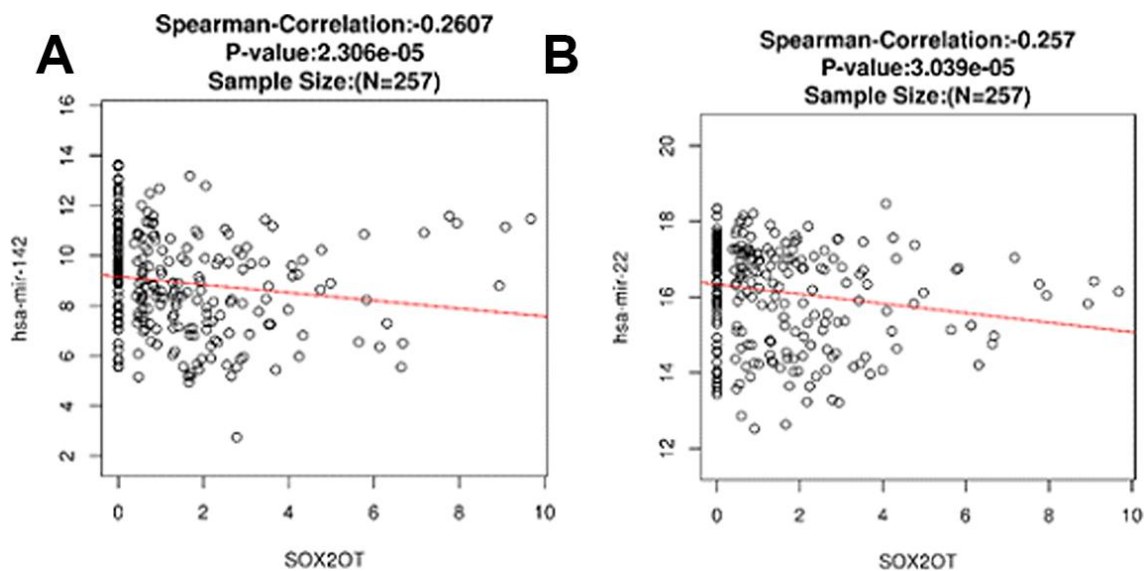

Supplementary Figure 2. The correlation of SOX2OT, miR-142 (A) miR-22 (B) expression in the TCGA database.

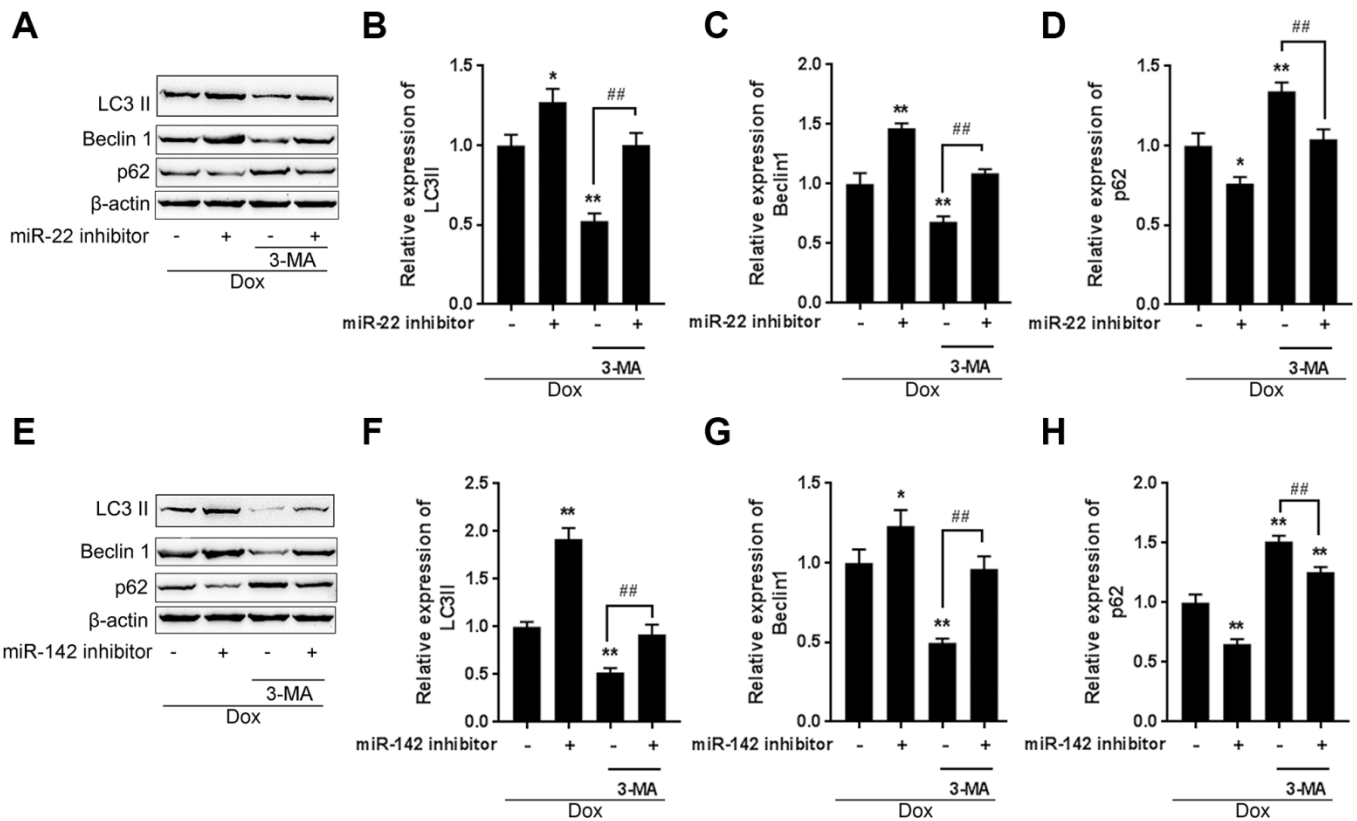

**Supplementary Figure 3. The effect of miR-142 and miR-22 on Dox-induced autophagy.** (A–D) U2OS cells were transfected with miR-142 inhibitor and co-treated with Dox (5  $\mu$ M) and 3-MA (5 mM) for 24 h and the protein levels of LC3 II, Beclin 1 and p62 were examined. (E–H) U2OS cells were transfected with miR-22 inhibitor and cotreated with Dox and 3-MA for 24 h and the protein levels of LC3 II, Beclin 1 and p62 were examined.

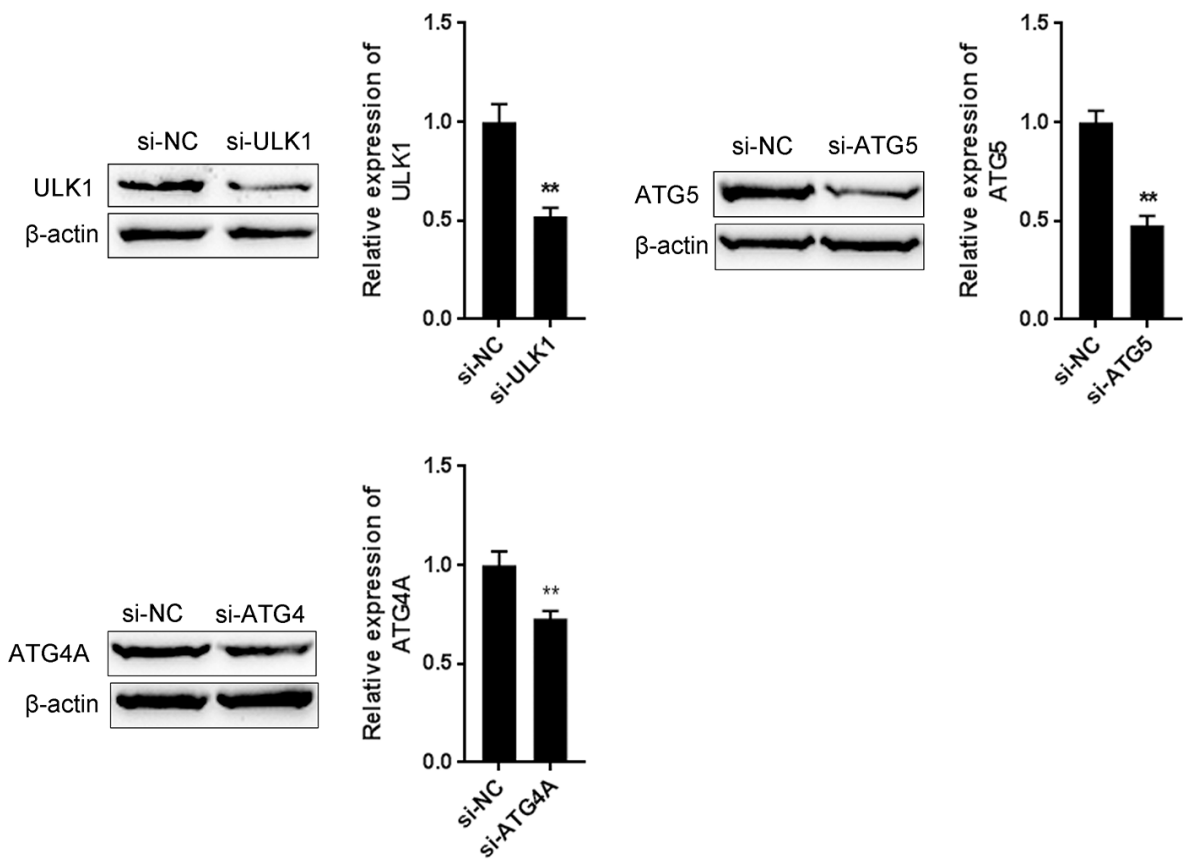

Supplementary Figure 4. The knockdown effects of ULK1, ATG5 and ATG4A were confirmed by immunoblotting.
